# Supplementary material for: A natural histone H2A variant lacking the Bub1 phosphorylation site and regulated depletion of centromeric histone CENP-A foster evolvability in Candida albicans
Source: PLoS Biol. 2019 Jun 21;17(6):e3000331. doi: 10.1371/journal.pbio.3000331 (PMC6613695; doi:10.1371/journal.pbio.3000331)
Supplement: S1 Table — qPCR and primers specific to each C. albicans chromosome were used to quantify the chromosome abundance in the indicated diploid strains. qPCR, quantitative PCR; WT, wild type. (XLSX) [file pbio.3000331.s008.xlsx]

## Sheet: Sheet1
Table S1. Whole genome ploidy analysis of WT and H2A and H2B homozygous gene disruption mutants
	Ch1 Left	Ch2 Left	Ch3 Left	Ch3 Right	Ch4 Left	Ch5Left	Ch6 Left	Chr7 Left	ChrR Left
WT (SN152)	1.06±0.08	1.06±0.06	1.02±0.04	1.15±0.01	1. 20±0.19	1.14±0.12	1.04±0.12	1.00±0.08	0.96±0.04
h2a.1ΔΔ	1.02±0.02	1.08±0.11	1.48±0.07	1.55±0.01	1.12±0.11	1.14±0.17	1.00±0.092	1.21±0.13	1.28±0.19
h2b.1ΔΔ	1.02±0.03	1.09±0.11	1.50±0.09	1.69±0.26	0.99±0.02	0.90±0.32	1.00±0.10	1.19±0.08	0.90±0.12
h2a.2ΔΔ	1.12±0.08	1.01±0.03	1.09±0.14	1.03±0.01	1.19±0.20	1.08±0.08	1.01±0.06	1.03±0.79	1.13±0.02
h2b.2ΔΔ	1.03±0.04	1.10±0.02	1.10±0.02	1.07±0.10	1.21±0.23	1.17±0.20	1.11±0.10	1.00±0.03	0.92±0.08
